# Supplementary material for: Highly cost-effective and sulfur/coking resistant VOx-grafted TiO2 nanoparticles as an efficient anode catalyst for direct conversion of dry sour methane in solid oxide fuel cells
Source: Royal Society of Chemistry journal article supplement (doi:10.1039/c5ta06453h), 2015-01-01
Supplement: c5ta06453h1.pdf [file c5ta06453h1.pdf]

Electronic Supplementary Information (ESI)

**Highly cost-effective and sulfur/coking resistant VO<sub>x</sub>-grafted TiO<sub>2</sub> nanoparticles as an efficient anode catalyst for direct conversion of dry sour methane in solid oxide fuel cells**

Alfonso Garcia<sup>a</sup>, Ning Yan<sup>b, a\*</sup>, Adrien Vincent<sup>a</sup>, Anand Singh<sup>c</sup>, Josephine M. Hill<sup>c</sup>, Karl T. Chuang<sup>a</sup>, Jing-Li Luo<sup>a\*</sup>

<sup>a</sup> Department of Chemical and Materials Engineering, University of Alberta, Edmonton, Alberta, T6G 2V4, Canada. Fax: (+1) 780 492 2881; Tel: (+1) 780 492 2232. E-mail: [jingli.luo@ualberta.ca](mailto:jingli.luo@ualberta.ca)

<sup>b</sup> Van't Hoff Institute for Molecular Sciences (HIMS), University of Amsterdam, Amsterdam, 1098XH, The Netherlands. Tel : (+31) 020 525 6468. E-mail : [n.yan@uva.nl](mailto:n.yan@uva.nl)

<sup>c</sup> Department of Chemical and Petroleum Engineering, University of Calgary, Calgary, Alberta, T2N 1N4, Canada. Tel: (+1) 403 210 9488. E-mail: [jhill@ucalgary.ca](mailto:jhill@ucalgary.ca)

Table S1 Peak positions and atomic ratios of V and Ti from XPS

|                                                                                          | <b>V 2p 3/2<br/>(eV)</b> | <b>Ti 2p 3/2<br/>(eV)</b> | <b>O 1s (eV)</b> | <b>N<sub>V</sub>/N<sub>Ti</sub> (atomic ratio)</b> |
|------------------------------------------------------------------------------------------|--------------------------|---------------------------|------------------|----------------------------------------------------|
| VO <sub>x</sub> /TiO <sub>2</sub> (25 °C)                                                | 517.27                   | 458.2                     | 529.8            | 0.16                                               |
| VO <sub>x</sub> /TiO <sub>2</sub> (800 °C<br>in air)                                     | 517.07                   | 458.6                     | 529.8            | 0.15                                               |
| VO <sub>x</sub> /TiO <sub>2</sub> (800 °C in<br>0.5% H <sub>2</sub> S+ CH <sub>4</sub> ) | 517.13                   | 458.2                     | 529.8            | 0.21                                               |

Table S2 Comparison of SOFC non-ohmic polarization resistance using various anode materials in different methane gas fuels.

| Anode Materials                                                                   | Fuel Gas                                | Non-ohmic Polarization Resistance ( $\Omega \text{ cm}^2$ )* | Temperature ( $^{\circ}\text{C}$ ) | Ref. No.  |
|-----------------------------------------------------------------------------------|-----------------------------------------|--------------------------------------------------------------|------------------------------------|-----------|
| $\text{La}_{0.75}\text{Sr}_{0.25}\text{Cr}_{0.5}\text{Mn}_{0.5}\text{O}_3$        | $\text{CH}_4$                           | 0.87                                                         | 900                                | [32]      |
| $\text{La}_4\text{Sr}_8\text{Ti}_{11}\text{Mn}_{0.5}\text{Ga}_{0.5}\text{O}_{38}$ | $\text{CH}_4$                           | 0.57                                                         | 900                                | [8]       |
| $\text{Pr}_{0.5}\text{Ba}_{0.5}\text{MnO}_3$                                      | $\text{CH}_4$                           | $\sim 0.4$                                                   | 850                                | [16]      |
| $\text{CeO}_2^{**}$                                                               | $\text{CH}_4$                           | $> 2$                                                        | 900                                | [33]      |
| $\text{Li}_{0.33}\text{La}_{0.56}\text{TiO}_3$                                    | $0.1\%\text{H}_2\text{S} + \text{H}_2$  | $> 0.35$                                                     | 800                                | [17]      |
| $\text{Ce}_{0.9}\text{Sr}_{0.1}\text{VO}_3$                                       | $0.5\%\text{H}_2\text{S} + \text{CH}_4$ | $> 17$                                                       | 900                                | [34]      |
| $\text{BaTiO}_3$                                                                  | $0.5\%\text{H}_2\text{S} + \text{CH}_4$ | $> 10$                                                       | 900                                | [35]      |
| LSBT                                                                              | $0.5\%\text{H}_2\text{S} + \text{CH}_4$ | 11.3                                                         | 850                                | [36]      |
| $\text{VO}_x/\text{TiO}_2\text{-LSBT}$                                            | $0.5\%\text{H}_2\text{S} + \text{CH}_4$ | 1.01                                                         | 850                                | This work |

Notes:

\*: Cathode material used in all cases was Sr-doped  $\text{LaMnO}_3$  except for work 16 and 17 which used NbSCF and BSCF, respectively.

\*\* :  $\text{CeO}_2$  was mixed with 50 wt% of  $\text{La}_{0.6}\text{Sr}_{0.4}\text{TiO}_3$ .
